# Supplementary material
Source: publisher site journal article supplement (https://www.dovepress.com/article/250355)
Supplement: Supplementary file 1 [file get_supplementary_file.php]

**Supplementary Table 1**. Association of lncRNA TMPO-AS1 expression with clinicopathologic features in patients with HCC.

| **Clinical parameter** | **Number of patients** | **TMPO-AS1** | | ***P*-value** |
| --- | --- | --- | --- | --- |
| **High (%)** | **Low (%)** |
| **Age (years)** |  |  |  | 0.513 |
| ≤60 | 17 | 7 | 10 |  |
| >60 | 25 | 14 | 11 |  |
| **Gender** |  |  |  | 0.309 |
| Female | 12 | 8 | 4 |  |
| Male | 30 | 13 | 17 |  |
| **Tumor size (cm)** |  |  |  | 0.034 |
| ≥5 | 17 | 15 | 2 |  |
| <5 | 25 | 6 | 19 |  |
| **Serum AFP (ng/mL)** |  |  |  | 0.402 |
| <20 | 13 | 6 | 7 |  |
| ≥20 | 29 | 15 | 14 |  |
| **HBsAg** |  |  |  | 0.103 |
| Negative | 15 | 3 | 12 |  |
| Positive | 27 | 18 | 9 |  |
| **Stage (TNM)** |  |  |  | 0.029 |
| I~II | 24 | 17 | 7 |  |
| III~IV | 18 | 4 | 14 |  |
| **Metastasis** |  |  |  | 0.011 |
| No | 24 | 8 | 16 |  |
| Yes | 18 | 13 | 5 |  |

TNM: tumor-node-metastases, HBsAg: hepatitis B surface antigen, AFP: alpha fetoprotein.

**Supplementary Table 2**. Primer sequence.

| **Primer** | **Sequence (5′-3′)** |
| --- | --- |
| TMPO-AS1 Forward | AGACGCCGATAAGGGACAG |
| TMPO-AS1 Reverse | AGCCAAGGGTCCTCACA |
| miR-320a Forward | GGGCTAAAAGCTGGGTTGA |
| miR-320a Reverse | CAGTGCGTGTCGTGGAGT |
| U6 Forward | GTGCTCGCTTCGGCAGCACATATAC |
| U6 Reverse | AAAAATATGGAACGCTTCACGAATTTG |
| SERBP1 Forward | CCTGGGCACTTACAGGAAGG-3′, |
| SERBP1 Reverse | GGTCCGATTCGTCGTCAAATAAC-3′; |
| GAPDH Forward | CTCACCGGATGCACCAATGTT-3′, |
| GAPDH Reverse | CGCGTTGCTCACAATGTTCAT-3′. |


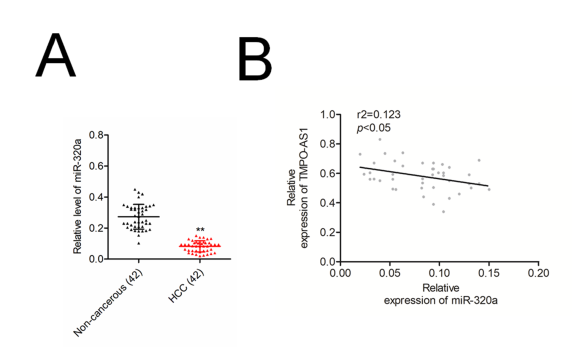


Supplementary Fig. 1. (A) The expression levels of miR-320a in HCC tissues and non-cancerous tissues were detected using qRT-PCR assay. ***P*<0.01 compared with non-cancerous. (B) Pearson's correlation analysis of the relationship between miR-320a level and TMPO-AS1 expression level in HCC tissues.
